# Supplementary material for: Induction of Brain Insulin Resistance and Alzheimer’s Molecular Changes by Western Diet
Source: MDPI journal article supplement (doi:10.3390/ijms23094744), 2022-04-25
Supplement: s1 [file s1]

## Supplementary Materials

# Induction of brain insulin resistance and Alzheimer's molecular changes by Western diet

Anna Mietelska-Porowska<sup>1</sup> †, Justyna Domańska<sup>1</sup> †, Andrew Want<sup>1</sup>, Angelika Więckowska-Gacek<sup>1</sup>, Dominik Chutorński<sup>1</sup>, Maciej Koperski<sup>1</sup>, Urszula Wojda<sup>1,\*</sup>

<sup>1</sup> Nencki Institute of Experimental Biology Polish Academy of Sciences, Warsaw, Poland  
Laboratory of Preclinical Testing of Higher Standard;

\* Correspondence: u.wojda@nencki.edu.pl; Tel.: +48 225892578, UW

† These authors contributed equally to this work.

**Figure S1: WD-derived insulin signaling impairment on AD biomarkers, analyzed for extreme values for each individual in all experimental and age groups (paragraph 2.3).**

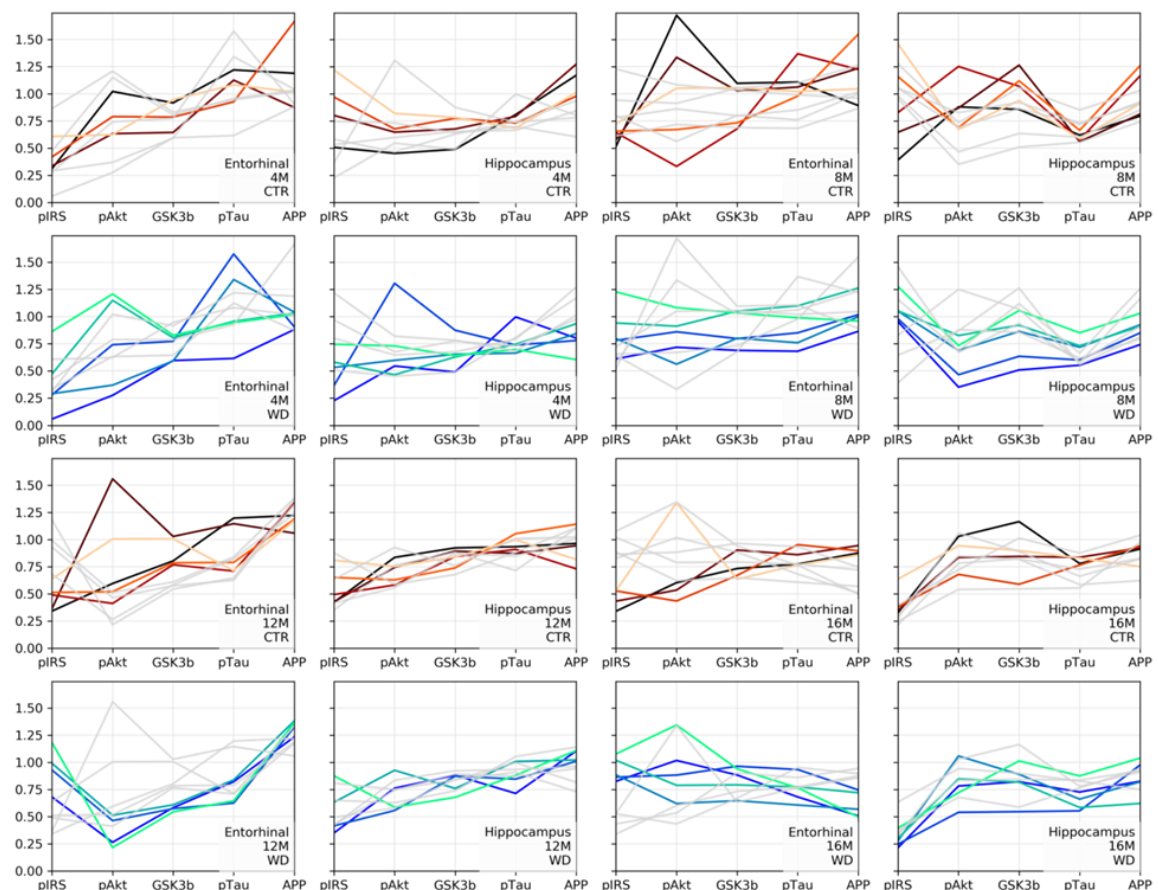

Table S1: Completed statistical data – analysis of peripheral markers in C57BL/6 mice (paragraph 2.1)

| Figure number:<br>Analyzed<br>parameter            | Age groups               | Statistical<br>test | Significance    | p-Value                | Value of F (DFn,<br>DFd)          |
|----------------------------------------------------|--------------------------|---------------------|-----------------|------------------------|-----------------------------------|
| Fig.1. Glucose                                     | ALL                      | 2way<br>ANOVA       | Interaction: ns | Interaction:<br>0.2284 | Interaction: $F_{(3,28)} = 1.530$ |
|                                                    |                          |                     | Age: ns         | Age: 0.1503            | Age: $F_{(3,28)} = 1.914$         |
|                                                    |                          |                     | Diet: **        | Diet: 0.0077           | Diet: $F_{(1,28)} = 8.255$        |
| Fig.1.<br>Glucose                                  | 4M vs. 16M<br>WD WD      | Tukey's<br>post-hoc | *               | 0.0404                 | -                                 |
| Fig.1.<br>Insulin                                  | ALL                      | 2way<br>ANOVA       | Interaction: ns | Interaction:<br>0.3169 | Interaction: $F_{(3,28)} = 1.231$ |
|                                                    |                          |                     | Age: ns         | Age: 0.2901            | Age: $F_{(3,28)} = 1.312$         |
|                                                    |                          |                     | Diet: **        | Diet: 0.0094           | Diet: $F_{(1,28)} = 7.787$        |
| Fig.1.<br>HOMA-IR                                  | ALL                      | 2way<br>ANOVA       | Interaction: ns | Interaction:<br>0.1056 | Interaction: $F_{(3,28)} = 2.240$ |
|                                                    |                          |                     | Age: ns         | Age: 0.2196            | Age: $F_{(3,28)} = 1.567$         |
|                                                    |                          |                     | Diet:**         | Diet:0.0026            | Diet: $F_{(1,28)} = 10.98$        |
| Fig.2.<br>p-IRS-1 (Ser616)<br>Entorhinal<br>cortex | ALL                      | 2way<br>ANOVA       | Interaction: *  | Interaction:<br>0.0165 | Interaction: $F_{(3,29)} = 4.023$ |
|                                                    |                          |                     | Age: **         | Age: 0.0010            | Age: $F_{(3,29)} = 7.104$         |
|                                                    |                          |                     | Diet: ****      | Diet: <0.0001          | Diet: $F_{(1,29)} = 25.18$        |
| Fig.2.<br>p-IRS-1 (Ser616)<br>Entorhinal<br>cortex | 4M vs. 8M<br>WD WD       | Tukey's<br>post-hoc | **              | 0.0042                 | -                                 |
| Fig.2.<br>p-IRS-1 (Ser616)<br>Entorhinal<br>cortex | 4M vs. 12M<br>WD WD      | Tukey's<br>post-hoc | **              | 0.0016                 | -                                 |
| Fig.2.<br>p-IRS-1 (Ser616)<br>Entorhinal<br>cortex | 4M vs. 16M<br>WD WD      | Tukey's<br>post-hoc | ***             | 0.0010                 | -                                 |
| Fig.2.<br>p-IRS-1 (Ser616)<br>Entorhinal<br>cortex | 12M vs. 12M<br>CTR<br>WD | Tukey's<br>post-hoc | **              | 0.0084                 | -                                 |
| Fig.2.<br>p-IRS-1 (Ser616)<br>Entorhinal<br>cortex | 16M vs. 16M<br>CTR<br>WD | Tukey's<br>post-hoc | **              | 0.0081                 | -                                 |
| Fig.2.<br>p-Akt (Ser473)<br>Entorhinal<br>cortex   | ALL                      | 2way<br>ANOVA       | Interaction: ns | Interaction:<br>0.3047 | Interaction: $F_{(3,29)} = 1.265$ |
|                                                    |                          |                     | Age: ns         | Age: 0.2769            | Age: $F_{(3,29)} = 1.352$         |
|                                                    |                          |                     | Diet: ns        | Diet: 0.3506           | Diet: $F_{(1,29)} = 0.899$        |

\*p&lt;0.05, \*\*p&lt;0.01

Table S2: Completed statistical data – analysis of brain markers in C57BL/6 mice (paragraph 2.2)

| Figure number:<br>Analyzed<br>parameter                  | Age groups               | Statistical test     | Significance                             | p-Value                                                | Value of F (DFn, DFd)                                                                                                 |
|----------------------------------------------------------|--------------------------|----------------------|------------------------------------------|--------------------------------------------------------|-----------------------------------------------------------------------------------------------------------------------|
| Fig.2:<br>p-GSK-3 $\beta$ (Ser9)<br>Entorhinal<br>cortex | ALL                      | 2way<br>ANOVA        | Interaction: *<br>Age: ns<br>Diet: ns    | Interaction:0.029<br>7<br>Age: 0.0705<br>Diet: 0.0733  | Interaction: F <sub>(3,29)</sub> =<br>3.439<br>Age: F <sub>(3,29)</sub> = 2.608<br>Diet: F <sub>(1,29)</sub> = 3.454  |
| Fig.2.<br>p-GSK-3 $\beta$ (Ser9)<br>Entorhinal<br>cortex | 12M vs. 12M<br>CTR<br>WD | Tukey's post-<br>hoc | *                                        | 0.0491                                                 | -                                                                                                                     |
| Fig.2.<br>p-Tau (Thr231)<br>Entorhinal<br>cortex         | ALL                      | 2way<br>ANOVA        | Interaction: ns<br>Age: *<br>Diet: ns    | Interaction:<br>0.6246<br>Age: 0.0123<br>Diet: 0.0726  | Interaction: F <sub>(3,29)</sub> =<br>0.5931<br>Age: F <sub>(3,29)</sub> = 4.324<br>Diet: F <sub>(1,29)</sub> = 3.471 |
| Fig.4.<br>p-IRS-1 (Ser616)<br>Hippocampus                | ALL                      | 2way<br>ANOVA        | Interaction: ns<br>Age: ****<br>Diet: ns | Interaction:<br>0.0926<br>Age: <0.0001<br>Diet: 0.2727 | Interaction: F <sub>(3,29)</sub> =<br>2.354<br>Age: F <sub>(3,29)</sub> = 11.97<br>Diet: F <sub>(1,29)</sub> = 1.250  |
| Fig.3.<br>p-IRS-1 (Ser616)<br>Hippocampus                | 4M vs. 8M<br>WD WD       | Tukey's post-<br>hoc | *                                        | 0.0108                                                 | -                                                                                                                     |
| Fig.3.<br>p-IRS-1 (Ser616)<br>Hippocampus                | 8M vs. 16M<br>WD WD      | Tukey's post-<br>hoc | ***                                      | 0.0003                                                 | -                                                                                                                     |
| Fig.3.<br>p-Akt (Ser473)<br>Hippocampus                  | ALL                      | 2way<br>ANOVA        | Interaction: ns<br>Age: ns<br>Diet: ns   | Interaction:<br>0.3352<br>Age: 0.4925<br>Diet: 0.3518  | Interaction: F <sub>(3,29)</sub> =<br>1.178<br>Age: F <sub>(3,29)</sub> = 0.822<br>Diet: F <sub>(1,29)</sub> = 0.895  |
| Fig.3.<br>p-GSK-3 $\beta$ (Ser9)<br>Hippocampus          | ALL                      | 2way<br>ANOVA        | Interaction: ns<br>Age: *<br>Diet: ns    | Interaction:<br>0.3954<br>Age: 0.0170<br>Diet: 0.0871  | Interaction: F <sub>(3,29)</sub> =<br>1.026<br>Age: F <sub>(3,29)</sub> = 3.993<br>Diet: F <sub>(1,29)</sub> = 3.137  |
| Fig.3.<br>p-GSK-3 $\beta$ (Ser9)<br>Hippocampus          | 4M vs. 8M<br>CTR CTR     | Tukey's post-<br>hoc | *                                        | 0.0372                                                 | -                                                                                                                     |
| Fig.3.<br>p-Tau (Thr231)<br>Hippocampus                  | ALL                      | 2way<br>ANOVA        | Interaction: ns<br>Age: ****<br>Diet: ns | Interaction:<br>0.0936<br>Age: <0.0001<br>Diet: 0.4117 | Interaction: F <sub>(3,29)</sub> =<br>2.344<br>Age: F <sub>(3,29)</sub> = 11.47<br>Diet: F <sub>(1,29)</sub> = 0.694  |
| Fig.3.<br>p-Tau (Thr231)<br>Hippocampus                  | 8M vs. 12M<br>CTR CTR    | Tukey's post-<br>hoc | ****                                     | <0.0001                                                | -                                                                                                                     |

\*p&lt;0.05, \*\*\*p&lt;0.001, \*\*\*\*p&lt;0.0001

Table S3: Completed statistical data – analysis of brain markers in C57BL/6 mice (paragraph 2.2)

| Figure number:<br>Analyzed<br>parameter | Age groups           | Statistical test     | Significance                            | p-Value                                                | Value of F (DFn,<br>DFd)                                                                     |
|-----------------------------------------|----------------------|----------------------|-----------------------------------------|--------------------------------------------------------|----------------------------------------------------------------------------------------------|
| Fig.4.<br>APP<br>Entorhinal<br>cortex   | ALL                  | 2way<br>ANOVA        | Interaction: ns<br>Age: ****<br>Diet: * | Interaction:<br>0.0687<br>Age: <0.0001<br>Diet: 0.0234 | Interaction: $F_{(3,29)} = 2.634$<br>Age: $F_{(3,29)} = 14.49$<br>Diet: $F_{(1,29)} = 5.727$ |
| Fig.4.<br>APP<br>Entorhinal<br>cortex   | 4M vs. 16M<br>WD WD  | Tukey's post-<br>hoc | *                                       | 0.0314                                                 | -                                                                                            |
| Fig.4.<br>APP<br>Entorhinal<br>cortex   | 8M vs. 16M<br>WD WD  | Tukey's post-<br>hoc | *                                       | 0.0113                                                 | -                                                                                            |
| Fig.4.<br>APP<br>Entorhinal<br>cortex   | 12M vs. 16M<br>WD WD | Tukey's post-<br>hoc | ****                                    | <0.0001                                                | -                                                                                            |
| Fig.4.<br>APP<br>Hippocampus            | ALL                  | 2way<br>ANOVA        | Interaction: *<br>Age: ns<br>Diet: ns   | Interaction:<br>0.0164<br>Age: 0.3531<br>Diet: 0.1239  | Interaction: $F_{(3,29)} = 4.031$<br>Age: $F_{(3,29)} = 1.130$<br>Diet: $F_{(1,29)} = 2.512$ |
| Fig.4.<br>APP<br>Hippocampus            | 4M vs. 4M<br>CTR WD  | Tukey's post-<br>hoc | *                                       | 0.0424                                                 | -                                                                                            |

\*p&lt;0.05, \*\*\*\*p&lt;0.0001

**Table S4: Completed statistical data – comparable analysis of brain markers in Tg2576 (APPswe) mice (paragraph 2.4)**

| Figure number:<br>Analyzed<br>parameter             | Age groups            | Statistical test     | Significance                            | p-Value                                            | Value of F (DFn,<br>DFd)                                                                      |
|-----------------------------------------------------|-----------------------|----------------------|-----------------------------------------|----------------------------------------------------|-----------------------------------------------------------------------------------------------|
| Fig.6A.<br>p-IRS-1 (Ser616)<br>Entorhinal<br>cortex | ALL                   | 2way ANOVA           | Interaction: ns<br>Age: **<br>Diet: *   | Interaction: 0.3039<br>Age: 0.0050<br>Diet: 0.0122 | Interaction: $F_{(2,19)} = 1.269$<br>Age: $F_{(2,19)} = 7.094$<br>Diet: $F_{(1,19)} = 7.663$  |
| Fig.6A.<br>p-Tau (Thr231)<br>Entorhinal<br>cortex   | ALL                   | 2way ANOVA           | Interaction: ns<br>Age: ***<br>Diet: ** | Interaction: 0.1109<br>Age: 0.0004<br>Diet: 0.0032 | Interaction: $F_{(2,19)} = 2.474$<br>Age: $F_{(2,19)} = 12.31$<br>Diet: $F_{(1,19)} = 11.35$  |
| Fig.6A.<br>p-Tau (Thr231)<br>Entorhinal<br>cortex   | 4M vs. 4M<br>CTR WD   | Tukey's post-<br>hoc | *                                       | 0.0284                                             | -                                                                                             |
| Fig.6A.<br>p-Tau (Thr231)<br>Entorhinal<br>cortex   | 4M vs. 8M<br>CTR CTR  | Tukey's post-<br>hoc | **                                      | 0.0048                                             | -                                                                                             |
| Fig.6A.<br>p-Tau (Thr231)<br>Entorhinal<br>cortex   | 4M vs. 12M<br>CTR CTR | Tukey's post-<br>hoc | *                                       | 0.0194                                             | -                                                                                             |
| Fig.6A.<br>APP<br>Entorhinal<br>cortex              | ALL                   | 2way ANOVA           | Interaction: ns<br>Age: ns<br>Diet: ns  | Interaction: 0.4321<br>Age: 0.1534<br>Diet: 0.2377 | Interaction: $F_{(2,19)} = 0.8774$<br>Age: $F_{(2,19)} = 2.073$<br>Diet: $F_{(1,19)} = 1.486$ |
| Fig.6B.<br>p-IRS-1 (Ser616)<br>Hippocampus          | ALL                   | 2way ANOVA           | Interaction: ns<br>Age: ns<br>Diet: ns  | Interaction: 0.3754<br>Age: 0.0504<br>Diet: 0.2780 | Interaction: $F_{(2,21)} = 1.027$<br>Age: $F_{(2,21)} = 3.456$<br>Diet: $F_{(1,21)} = 1.240$  |
| Fig.6B.<br>p-Tau (Thr231)<br>Hippocampus            | ALL                   | 2way ANOVA           | Interaction: ns<br>Age: ns<br>Diet: ns  | Interaction: 0.1660<br>Age: 0.9990<br>Diet: 0.6162 | Interaction: $F_{(2,19)} = 1.977$<br>Age: $F_{(2,19)} = 0.001$<br>Diet: $F_{(1,19)} = 0.26$   |
| Fig.6B.<br>APP<br>Hippocampus                       | ALL                   | 2way ANOVA           | Interaction: *<br>Age: ***<br>Diet: ns  | Interaction: 0.0272<br>Age: 0.0009<br>Diet: 0.0710 | Interaction: $F_{(2,20)} = 4.338$<br>Age: $F_{(2,20)} = 10.24$<br>Diet: $F_{(1,20)} = 3.635$  |
| Fig.6B.<br>APP<br>Hippocampus                       | 4M vs. 4M<br>CTR WD   | Tukey's post-<br>hoc | *                                       | 0.0277                                             | -                                                                                             |
| Fig.6B.<br>APP<br>Hippocampus                       | 4M vs. 8M<br>CTR CTR  | Tukey's post-<br>hoc | **                                      | 0.0059                                             | -                                                                                             |
| Fig.6B.<br>APP<br>Hippocampus                       | 4M vs. 12M<br>CTR CTR | Tukey's post-<br>hoc | **                                      | 0.0018                                             | -                                                                                             |

\*p<0.05, \*\*p<0.01
